# Supplementary material
Source: Research Square preprint supplement (doi:10.21203/rs.3.rs-9650845/v1)
Supplement: Supplementary file 1 [file 58c4c8a29aac845e3f168f75.docx]

Supplementary Material

Table. S1 The database sources and software utilized

| gutMGene v2.0 | http://biocomputing.hrbmu.edu.cn/gutmgene/#/Resource |
| --- | --- |
| GeneCards | https://www.genecards.org/ |
| DisGeNET | https://disgenet.com/ |
| OMIM | https://www.omim.org/ |
| TCMSP | https://www.tcmsp-e.com/ |
| STP | https://swisstargetprediction.ch/predict.php |
| SEA | https://sea.bkslab.org/ |
| STRING | https://string-db.org |
| WebGestalt | https://www.webgestalt.org/ |
| SwissADME | http://www.swissadme.ch/index.php |
| ADMETlab | https://admetmesh.scbdd.com/ |
| PubChem | https://pubchem.ncbi.nlm.nih.gov/ |
| bioinformatics | https://www.bioinformatics.com.cn/ |
| Protein Data Bank | https://www.rcsb.org/ |

**Fig. s1 Carotid ultrasound shows a trend of improvement in vascular structural parameters after HSYA treatment.**

Long-term HFD can induce atherosclerotic changes, leading to hemodynamic abnormalities in the carotid artery. As shown in Fig. s1, compared with the normal control group, animals on a long-term high-fat diet exhibited a significantly reduced carotid artery blood flow velocity. Color Doppler ultrasound of the carotid artery in the model control (MC) group revealed markedly decreased blood flow velocity and a filling defect in the color flow signal, indicating insufficient local perfusion. However, there was no obvious thickening of the intima-media layer within the vessel lumen, nor were any distinct abnormal echoes (such as plaque or thrombus formation) detected. Following HSYA treatment, the above hemodynamic parameters improved significantly, as manifested by an increased carotid artery blood flow velocity, reduced filling defect of the color flow signal, and a more uniform distribution of blood flow. These results suggest that HSYA may, to some extent, alleviate the reduction in carotid artery flow velocity induced by a high-fat diet, possibly by improving vasomotor function or rheological properties of blood flow, thereby exerting a potential protective effect on vascular hemodynamics.

| **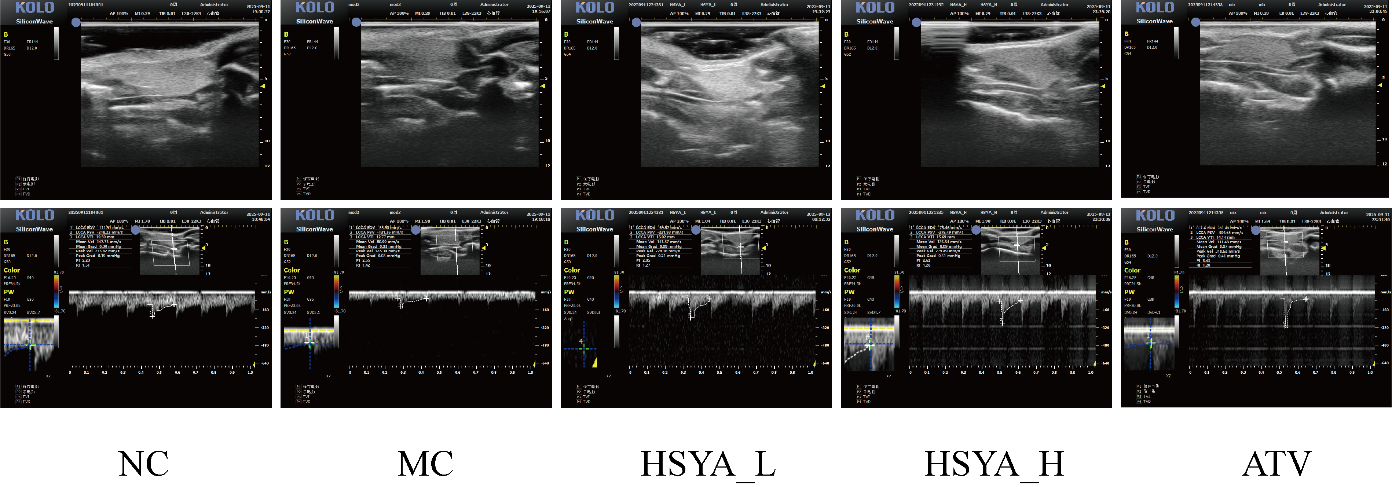**  Fig. s1 Carotid ultrasound shows a trend of improvement in vascular structural parameters after HSYA treatment. |
| --- |

Table. S2 Explanation of parameter range for drug toxicity evaluation.

| Parameter | Definition | Range and interpretation |
| --- | --- | --- |
| Carcinogenicity | Potential risk of cancer induction caused by the compound | <0.3: Low risk |
| 0.3–0.7: Moderate risk |
| >0.7: High risk |

Continued Table. S2 Explanation of parameter range for drug toxicity evaluation.

| Parameter | Definition | Range and interpretation |
| --- | --- | --- |
| hERG Inhibition | Cardiotoxicity risk due to inhibition of the hERG potassium channel, which may cause QT prolongation and arrhythmias | <0.1: Low risk |
| 0.1–0.3: Moderate risk |
| >0.3: High risk |
| H-HT | Human hepatotoxicity: likelihood of liver cell damage induced by  the compound | <0.2: Low risk |
| 0.2–0.5: Moderate risk |
| >0.5: High risk |
| DILI | Drug-induced liver injury: prediction of clinically relevant  hepatotoxicity | <0.1: Low risk |
| 0.1–0.3: Moderate risk |
| >0.3: High risk |
| LD50_oral | Oral median lethal dose: estimated dose causing death in 50% of  rodents (unit: mg/kg) | >5,000: Practically non-toxic (category 5) |
| 300–2,000: Moderately toxic (category 3–4) |
| <50: Highly toxic (category 1) |
