# Supplementary material
Source: Research Square preprint supplement (doi:10.21203/rs.3.rs-9650845/v1)

**Graphical Abstract**


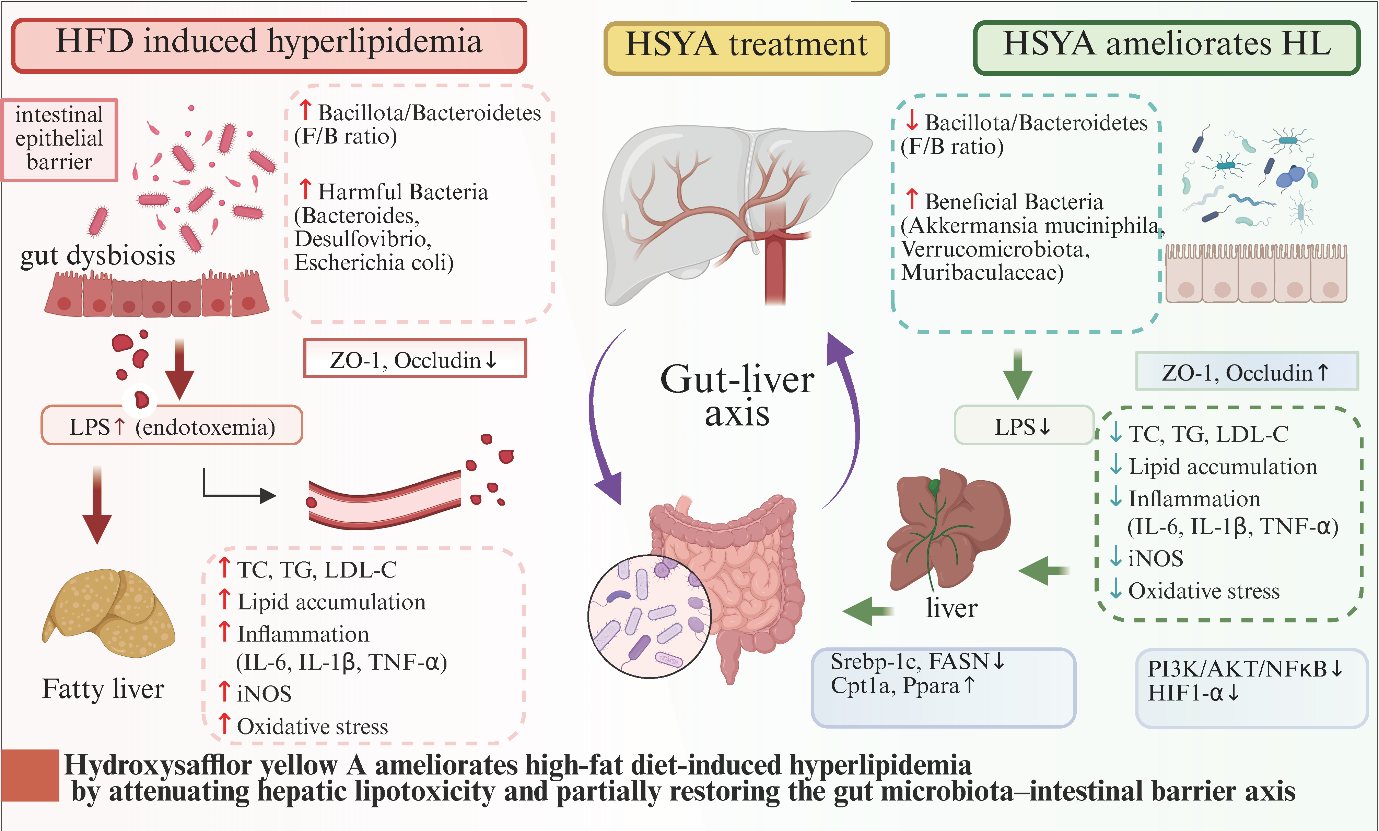

Supplement: Supplementary file 2 [file 58f05caa6dde7abb8f4e7e6c.docx]
